# Supplementary material for: Rebuilding soil organic C stocks in degraded grassland by grazing exclusion: a linked decline in soil inorganic C
Source: PeerJ. 2020 May 5;8:e8986. doi: 10.7717/peerj.8986 (PMC7207218; doi:10.7717/peerj.8986)
Supplement: Supplemental Information 1 — The data in different experiment sites [file peerj-08-8986-s001.xls]

## Sheet: Grazing 
Grazing(1)							Grazing (2)							Fencing 15 (3)	Grazing(3)
Longitude：106°24’13.3”E		Latitude：36°10’03.6”N					Longitude：106°24’12.8”E		Latitude：36°10’00.7”N
soil depth	（TC）	IC	TOC	Bulk Density	water content	pH	soil depth	（TC）	IC	TOC	Bulk Density	water content	PH	soil depth	（TC）	IC	TOC	Bulk Density	water content	PH
cm	%	%	%	g/cm3	%		cm	%	%	%	g/cm3	%		cm	%	%	%	g/cm3	%
0-20	3.486	2.01697	1.46903	1.0264	0.127687	8.656	0-20	3.017	1.60502	1.41198	1.09	0.121	8.636	0-20	3.15	1.70396	1.44604	1.12	0.114887	7.34857
20-40	3.255	1.85595	1.39905	1.0937	0.122864	8.647	20-40	2.929	1.50161	1.42739	1.06	0.130115	8.814	20-40	2.98	1.56365	1.41635	1.15	0.123517	7.46286
40-60	2.83	1.81103	1.01897	1.0596	0.111738	8.712	40-60	3.026	2.03524	0.990756	1.05	0.12461	8.664	40-60	2.856	1.88656	0.969438	1.14	0.115239	4.97
60-80	2.635	1.93285	0.702152	1.1431	0.127244	8.73	60-80	2.965	2.27177	0.693227	1.09	0.117265	9.016	60-80	2.795	2.09547	0.699526	1.17	0.123788	8.77857
80-100	2.432	1.93687	0.495127	1.19	0.0724754	8.808	80-100	2.809	2.33993	0.469066	1.1	0.0784471	9.11	80-100	2.5698	2.10222	0.467577	1.16	0.0765284	8.84143
100-120	2.247	1.89633	0.350668	1.18	0.0721983	8.53	100-120	2.093	1.73195	0.361054	1.17	0.0674022	9.112	100-120	2.3562	1.99094	0.365264	1.21	0.0741578	8.86286
120-140	2.116	1.92241	0.193592	1.2	0.0700963	8.762	120-140	2.213	2.01576	0.197243	1.18	0.0630846	8.842	120-140	2.1035	1.91346	0.190041	1.21	0.074198	9.05571
140-160	2.029	1.82443	0.204571	1.22	0.0754975	9.11	140-160	2.045	1.83036	0.214645	1.19	0.0655446	9.124	140-160	1.9632	1.7765	0.186696	1.21	0.0771139	9.05286
160-180	1.958	1.74867	0.209327	1.2307	0.0781686	9.128	160-180	2.012	1.81143	0.200565	1.23	0.0686695	9.224	160-180	1.8957	1.67432	0.221379	1.22	0.0767905	7.74286
180-200	1.848	1.53053	0.317467	1.2453	0.0857196	9.12	180-200	1.842	1.52251	0.319485	1.19	0.0664054	9.294	180-200	1.6105	1.30209	0.308407	1.26	0.0723355	7.79429
200-220	1.985	1.72301	0.261989	1.2527	0.0861702	9.018	200-220	1.895	1.58809	0.306907	1.23	0.0668839	9.248	200-220	1.6021	1.31089	0.291215	1.25	0.0789319	9.16857
220-240	1.983	1.68926	0.293738	1.1758	0.0960575	9.008	220-240	1.83	1.53834	0.291664	1.19	0.0632253	9.208	220-240	1.6901	1.39633	0.293767	1.26	0.0759749	9.18143
240-260	2.025	1.71938	0.305621	1.1932	0.100651	9.084	240-260	1.841	1.5106	0.330404	1.2	0.0702259	9.173	240-260	1.5645	1.23002	0.334483	1.24	0.0707331	7.84714
260-280	2.021	1.68755	0.333454	1.246	0.104255	8.938	260-280	1.966	1.63354	0.332461	1.23	0.0754026	9.166	260-280	1.6325	1.2911	0.341397	1.25	0.0767965	8.74564
280-300	2.072	1.80899	0.263007	1.2548	0.102838	9.192	280-300	1.93	1.64738	0.282622	1.24	0.0770747	9.272	280-300	1.6356	1.36073	0.274873	1.26	0.075015	9.19714
300-320	2.046	1.80294	0.243058	1.2317	0.108844	9.044	300-320	1.887	1.62704	0.259955	1.23	0.0790913	9.202	300-320	1.712	1.45401	0.257994	1.24	0.0794466	8.00571
320-340	2.179	1.90413	0.274873	1.2641	0.119869	9.174	320-340	1.949	1.67421	0.274793	1.25	0.0813182	9.456	320-340	1.8321	1.54333	0.288773	1.27	0.0824095	7.90571
340-360	2.343	2.06435	0.278655	1.2393	0.122237	9.166	340-360	1.974	1.71716	0.256836	1.24	0.079689	9.59	340-360	1.8503	1.58255	0.267746	1.26	0.0855152	9.19
360-380	2.212	1.96576	0.246238	1.2157	0.122192	9.15	360-380	1.991	1.70177	0.289234	1.26	0.0845829	9.554	360-380	1.941	1.70893	0.232067	1.27	0.0898876	7.83286
380-400	2.121	1.83316	0.287844	1.2893	0.12242	9.054	380-400	1.926	1.64132	0.284677	1.25	0.0789641	9.57	380-400	1.9852	1.72041	0.264795	1.3	0.0927281	9.26714
400-420	2.447	2.1034	0.3436	1.29	0.121596	8.962	400-420	1.923	1.57362	0.349383	1.28	0.0776928	9.578	400-420	1.8774	1.53601	0.341386	1.28	0.0922161	9.18286
420-440	2.365	2.04499	0.320011	1.3017	0.118395	8.97	420-440	1.886	1.57329	0.312713	1.27	0.077977	9.594	420-440	1.9866	1.68737	0.299226	1.29	0.105601	9.18
440-460	2.64	2.34668	0.293321	1.2871	0.117692	8.92	440-460	1.985	1.64463	0.340367	1.24	0.080869	9.846	440-460	2.0123	1.73108	0.281221	1.28	0.0895594	9.31286
460-480	2.607	2.32214	0.284857	1.2719	0.115481	8.994	460-480	1.956	1.64303	0.312967	1.26	0.0876502	9.597	460-480	2.3625	2.07731	0.285189	1.29	0.0933501	9.36574
480-500	2.7	2.41339	0.286613	1.2969	0.110504	8.98	480-500	2.033	1.70421	0.328795	1.28	0.0890345	9.382	480-500	2.2354	1.9606	0.274804	1.31	0.101422	9.36573

## Sheet: Fencing  15
Fencing 15 (1)							Fencing 15 (2)							Fencing 15 (3)
longitude：106°22’53.1”E		latitude：36°15’07.3”N					longitude：106°23’09.9”E		latitude：36°15’03.4”N					longtitude：106°23’14.0”E		latitude：36°16’02.9”N
soil depth	（TC）	IC	TOC	Buik Density	Water Content	PH	soil depth	（TC）	IC	TOC	Buik Density	water content	PH	soil depth	（TC）	IC	TOC	Buik Density	water content	PH
cm	%	%	%	g/cm3	%		cm	%	%	%	g/cm3	%		cm	%	%	%	g/cm3	%
0-20	3.217	1.38292	1.83408	0.898036	0.15983	8.61429	0-20	2.992	1.21795	1.77405	0.91	0.162863	6.22429	0-20	3.047	1.22374	1.82326	0.88	0.137848	6.739
20-40	3.011	1.27508	1.73592	0.946036	0.144238	6.16	20-40	2.686	0.96272	1.72328	0.89	0.143945	6.21	20-40	3.13	1.37635	1.75365	0.92	0.145378	6.906
40-60	2.353	0.973371	1.37963	1.05	0.146967	8.61714	40-60	2.599	1.23363	1.36537	1.1	0.145694	6.23857	40-60	2.987	1.5998	1.3872	1.09	0.156995	6.96
60-80	2.351	0.99701	1.35399	1.02	0.144179	6.16429	60-80	2.265	0.954826	1.31017	1.05	0.155583	6.27429	60-80	2.823	1.46445	1.35855	1.03	0.148684	5.232
80-100	2.374	1.36389	1.01011	1.12	0.154906	6.34714	80-100	2.412	1.41635	0.995647	1.09	0.148164	6.29714	80-100	2.564	1.58241	0.981595	1.1	0.143842	6.976
100-120	2.057	1.27747	0.779534	1.15	0.0775164	8.84143	100-120	2.172	1.39835	0.773653	1.19	0.0870414	6.39	100-120	2.555	1.78458	0.770418	1.2	0.0912475	5.698
120-140	2.009	1.47602	0.532978	1.2	0.086178	8.88	120-140	2.068	1.55937	0.508629	1.23	0.0805994	5.06	120-140	2.366	1.85477	0.511229	1.19	0.0978514	7.038
140-160	1.861	1.49697	0.364031	1.2	0.0875743	8.92286	140-160	1.893	1.53374	0.359261	1.22	0.0809969	6.3	140-160	2.285	1.91766	0.367338	1.2307	0.0991903	7.074
160-180	1.977	1.66049	0.316514	1.24	0.0837126	8.76429	160-180	1.944	1.49896	0.445038	1.2	0.0843723	7.55857	160-180	2.066	1.64725	0.418746	1.2453	0.0895313	7.044
180-200	1.897	1.62946	0.267544	1.31	0.0846409	8.71	180-200	1.852	1.58262	0.269384	1.2	0.0832904	7.55	180-200	2.009	1.77143	0.23757	1.2527	0.0957859	8.8
200-220	2.01	1.67971	0.330287	1.19	0.0853973	7.70571	200-220	1.902	1.57385	0.328151	1.21	0.0821966	6.25429	200-220	1.923	1.61825	0.304754	1.1758	0.0926129	8.8
220-240	1.892	1.66998	0.222019	1.23	0.10487	8.86714	220-240	1.878	1.64418	0.233821	1.22	0.0823574	8.77429	220-240	1.9	1.66223	0.237768	1.1932	0.0916996	7.89
240-260	1.974	1.73915	0.234848	1.29	0.0903471	8.76857	240-260	1.817	1.47214	0.344859	1.21	0.0855532	7.52847	240-260	1.904	1.64129	0.262706	1.246	0.09334	7.04
260-280	1.954	1.71052	0.243478	1.28	0.102751	9.06857	260-280	1.874	1.58416	0.289842	1.24	0.0922557	7.55	260-280	1.82	1.56876	0.251236	1.2548	0.0967356	5.418
280-300	1.94	1.68402	0.255983	1.26	0.110876	9.07714	280-300	1.901	1.65626	0.244739	1.22	0.100969	6.25429	280-300	1.927	1.64693	0.280065	1.2317	0.0930544	8.906
300-320	1.994	1.74252	0.251482	1.23	0.111313	7.72714	300-320	1.945	1.70735	0.237651	1.34	0.10615	8.77429	300-320	1.876	1.63462	0.241378	1.2641	0.0953539	8.934
320-340	2.052	1.76956	0.282445	1.2	0.119314	7.66286	320-340	1.922	1.6574	0.264598	1.3	0.11562	7.52857	320-340	1.902	1.62509	0.276908	1.2393	0.0987799	8.91
340-360	1.979	1.67952	0.299479	1.24	0.127225	6.40286	340-360	1.891	1.59929	0.291714	1.26	0.108237	7.53429	340-360	1.894	1.60597	0.288031	1.2157	0.0992819	8.95
360-380	1.938	1.66256	0.275441	1.26	0.124969	8.97	360-380	1.97	1.73869	0.231308	1.25	0.123099	7.54571	360-380	1.819	1.54943	0.26957	1.2893	0.0905074	8.88
380-400	1.955	1.72778	0.22722	1.25	0.119403	7.63143	380-400	1.971	1.73946	0.231539	1.31	0.10898	7.50143	380-400	1.838	1.60877	0.229226	1.29	0.0962822	8.89
400-420	2.004	1.74146	0.262544	1.29	0.122972	5.09429	400-420	1.993	1.71224	0.280756	1.25	0.124943	8.68	400-420	1.83	1.56182	0.268176	1.3017	0.0861593	8.824
420-440	2.003	1.66229	0.340709	1.28	0.127059	8.94286	420-440	2.012	1.74727	0.26473	1.26	0.120717	7.48143	420-440	1.745	1.43848	0.306522	1.2871	0.0919629	8.802
440-460	2.035	1.71867	0.316326	1.29	0.126993	8.92143	440-460	1.929	1.61965	0.309354	1.28	0.121416	8.72857	440-460	1.807	1.47923	0.327769	1.2719	0.0937979	8.854
460-480	2.016	1.69685	0.319147	1.26	0.1248	8.65893	460-480	1.957	1.65376	0.303243	1.28	0.120243	7.46143	460-480	1.755	1.45466	0.300336	1.2969	0.0974902	8.966
480-500	1.98	1.69	0.29	1.29	0.128841	9.45872	480-500	1.85	1.551	0.299	1.27	0.122272	7.28571	480-500	1.851	1.5497	0.3013	1.2648	0.103313	8.95

## Sheet: Fencing 30
Fencing 30 (1)							Fencing 30 (2)							Fencing 30 (3)
Longitude：106°22’53.1”E		Latitude：36°15’07.3”N					Longitude：106°23’09.9”E		Latitude：36°15’03.4”N					Longitude：106°23’14.0”E		Latitude：36°16’02.9”N
soil depth	（TC）	IC	TOC	Bulk Density	water content	PH	soil depth	（TC）	IC	TOC	Bulk Density	water content	PH	soil depth	（TC）	IC	TOC	Bulk Density	water content	PH
cm	%	%	%	g/cm3	%		cm	%	%	%	g/cm3	%		cm	%	%	%	g/cm3	%
0-20	3.725	1.37746	2.34754	0.894036	0.159183	8.48	0-20	3.6	1.21281	2.38719	0.95	0.146987	7.64	0-20	3.752	1.502	2.25	0.92	0.147436	6.39714
20-40	3.012	0.715355	2.29664	0.986036	0.134869	6.07	20-40	3.157	0.90163	2.25537	0.95	0.16836	7.88	20-40	2.927	0.747	2.18	0.98	0.130266	6.09857
40-60	2.969	1.21219	1.75681	0.994036	0.140699	7.26	40-60	3.033	1.14884	1.88416	0.96	0.127898	7.76	40-60	2.625	0.868192	1.75681	0.97	0.127009	4.11357
60-80	2.424	0.814989	1.60901	0.996036	0.153798	7.26	60-80	2.868	1.2344	1.6336	0.98	0.142954	7.13	60-80	2.296	0.686989	1.60901	0.95	0.130841	5.97857
80-100	2.138	0.642926	1.49507	1.01204	0.133697	6.09	80-100	2.661	1.31865	1.34235	1.02	0.16178	7.18	80-100	2.165	0.669926	1.49507	1.03	0.141195	5.98
100-120	2.276	0.796846	1.47915	1.09004	0.121467	8.64	100-120	2.522	1.08958	1.43242	1.09	0.143407	8.46	100-120	1.999	0.519846	1.47915	1.12	0.121968	7.23714
120-140	2.208	0.773833	1.43417	1.14604	0.120416	8.67	120-140	2.468	1.05158	1.41642	1.09	0.113304	8.33	120-140	1.979	0.544833	1.43417	1.13	0.115702	4.77667
140-160	2.162	0.788348	1.37365	1.15904	0.118173	8.84	140-160	2.376	1.00872	1.36728	1.21	0.108926	8.63	140-160	1.854	0.480348	1.37365	1.26	0.117514	8.39857
160-180	2.286	1.1203	1.1657	1.16304	0.110424	8.91	160-180	2.31	1.11776	1.19224	1.2	0.105846	8.87	160-180	1.97	0.8043	1.1657	1.18	0.116593	7.56571
180-200	2.144	1.74727	0.39673	1.2167	0.1098	8.92	180-200	2.312	1.92049	0.391515	1.24	0.10114	8.85	180-200	1.998	1.60127	0.39673	1.2	0.118378	8.52571
200-220	2.093	1.72204	0.37096	1.15204	0.108369	8.8	200-220	2.484	2.1093	0.374703	1.19	0.118363	8.86	200-220	2.058	1.68704	0.37096	1.23	0.109442	8.62143
220-240	2.117	1.73198	0.385018	1.20004	0.116156	8.72	220-240	2.212	1.82092	0.39108	1.21	0.107972	8.88	220-240	2.074	1.68898	0.385018	1.18	0.108168	8.64571
240-260	2.107	1.72211	0.384888	1.23104	0.115886	7.47	240-260	2.367	1.96753	0.399468	1.21	0.0964073	8.91	240-260	2.267	1.88211	0.384888	1.24	0.118677	8.35143
260-280	2.159	1.83367	0.325329	1.20304	0.112881	7.61	260-280	2.176	1.84968	0.326315	1.3	0.106355	8.94	260-280	2.262	1.93667	0.325329	1.31	0.110748	7.56143
280-300	2.024	1.64278	0.381223	1.22604	0.110811	7.58	280-300	1.865	1.49005	0.374949	1.23	0.1	8.95	280-300	2.139	1.75778	0.381223	1.3	0.109594	7.69
300-320	1.853	1.52258	0.330424	1.19804	0.10818	8.86	300-320	1.94	1.61625	0.323749	1.22	0.0976312	8.95	300-320	2.126	1.79558	0.330424	1.24	0.0982028	7.64
320-340	1.97	1.65336	0.31664	1.22604	0.112142	8.99	320-340	1.901	1.58433	0.316673	1.24	0.100393	8.9	320-340	2.305	1.98836	0.31664	1.25	0.101992	8.93857
340-360	1.923	1.62282	0.300182	1.22104	0.106998	8.86	340-360	1.824	1.53474	0.28926	1.25	0.101076	9.01	340-360	2.209	1.90882	0.300182	1.24	0.101099	7.64143
360-380	1.835	1.51912	0.315877	1.23504	0.105231	9.01	360-380	1.831	1.52673	0.304271	1.26	0.100833	8.62	360-380	2.129	1.81312	0.315877	1.26	0.0871435	7.64137
380-400	1.973	1.65319	0.319813	1.25204	0.110169	9.01	380-400	1.943	1.603	0.340004	1.25	0.104298	8.79	380-400	1.872	1.55219	0.319813	1.27	0.0754551	7.74429
400-420	1.884	1.56387	0.320133	1.28207	0.10649	7.71	400-420	2.049	1.73265	0.316351	1.25	0.111048	9.03	400-420	1.888	1.56787	0.320133	1.28	0.0827976	7.61714
420-440	2.011	1.67054	0.340458	1.26404	0.115805	8.76	420-440	1.953	1.63385	0.319148	1.24	0.101658	9.01	420-440	1.915	1.57454	0.340458	1.27	0.0825688	8.94714
440-460	1.95	1.6163	0.333701	1.25204	0.100699	7.69	440-460	1.921	1.62413	0.296868	1.24	0.118051	9	440-460	1.826	1.4923	0.333701	1.26	0.0808642	9.00857
460-480	1.957	1.63891	0.318089	1.24036	0.0986159	7.72	460-480	1.993	1.73822	0.254782	1.25	0.103687	9.06	460-480	1.859	1.54091	0.318089	1.28	0.0828145	8.89365
480-500	1.897	1.59045	0.306547	1.25604	0.102573	7.69	480-500	2.017	1.72593	0.291067	1.26	0.102211	9.11	480-500	1.954	1.64745	0.306547	1.3	0.0881362	9.67845
